# Supplementary material for: Bacterial Outer Membrane Vesicle-Mediated Cytosolic Delivery of Flagellin Triggers Host NLRC4 Canonical Inflammasome Signaling
Source: PubMed Central journal article supplement (PMC7708323; doi:10.3389/fimmu.2020.581165), 2020-11-18
Supplement: DataSheet_1.pdf [file DataSheet_1.pdf]

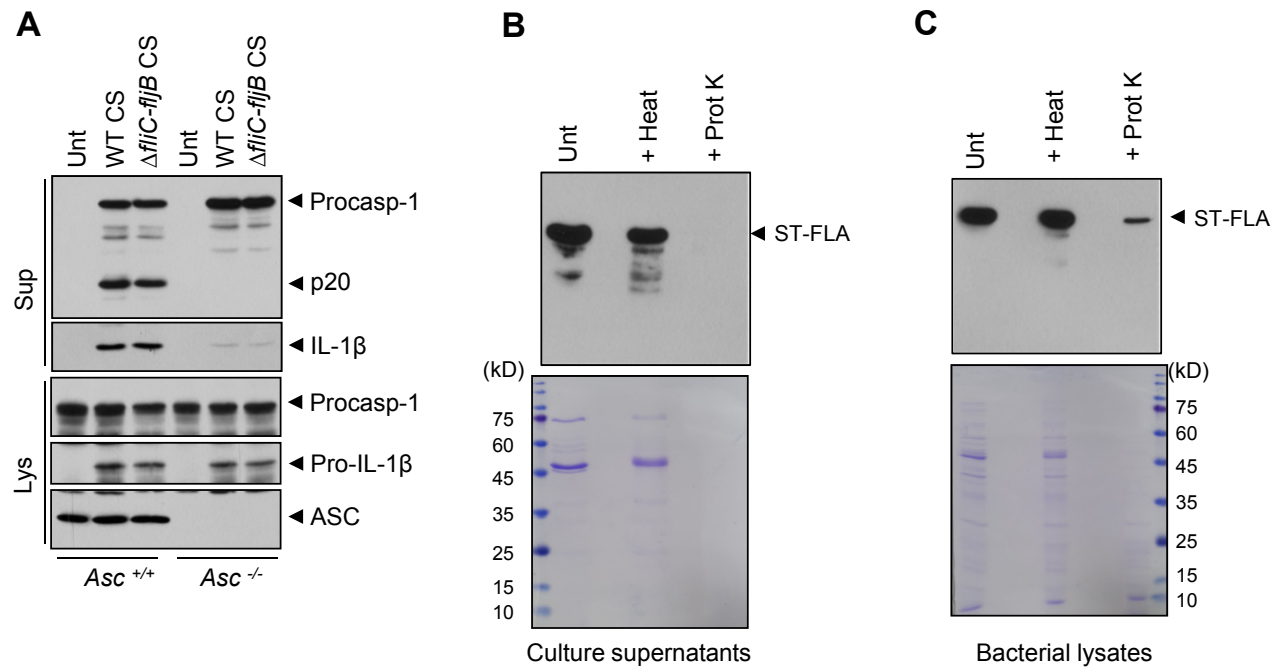

**Supplementary Figure S1. Culture supernatants from *S. typhimurium* promotes ASC-dependent inflammasome activation.** (A) Immunoblots from *Asc*<sup>+/+</sup> or *Asc*<sup>-/-</sup> immortalized BMDMs treated with WT or  $\Delta$ *flic-fljB* *S. typhimurium* CS (1/10 vol of medium) for 6 h. Culture supernatants (Sup) or cellular lysates (Lys) were immunoblotted with the indicated antibodies. Unt, untreated. (B, C) Immunoblots (upper panel) by anti-ST-FliC antibody and coomassie stained gels (lower panel) of *S. typhimurium* culture supernatants (B) or lysates (C) after heat treatment (97°C, 30 min) or proteinase K treatment (10  $\mu$ g/ml, 30 min).

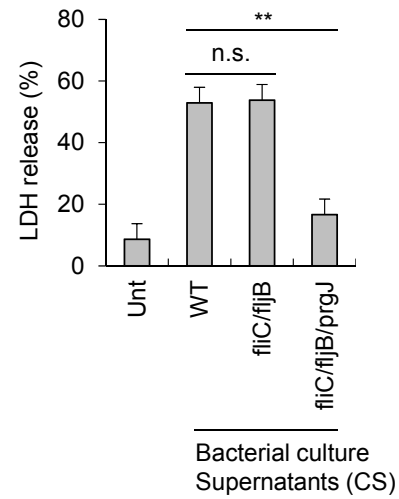

**Supplementary Figure S2. Culture supernatants from *S. typhimurium* promotes macrophage cell death.** Quantification of LDH release into culture supernatants of mouse BMDMs treated with WT or  $\Delta$ *fliC-fljB* or  $\Delta$ *fliC-fljB-prgJ* *S. typhimurium* (SL1344) CS (1/20 vol of medium) for 6 h. ( $n = 3$ ) Unt, untreated. Asterisk indicates significant difference. (\*\* $P < 0.005$ , n.s. not significant, one-way ANOVA)

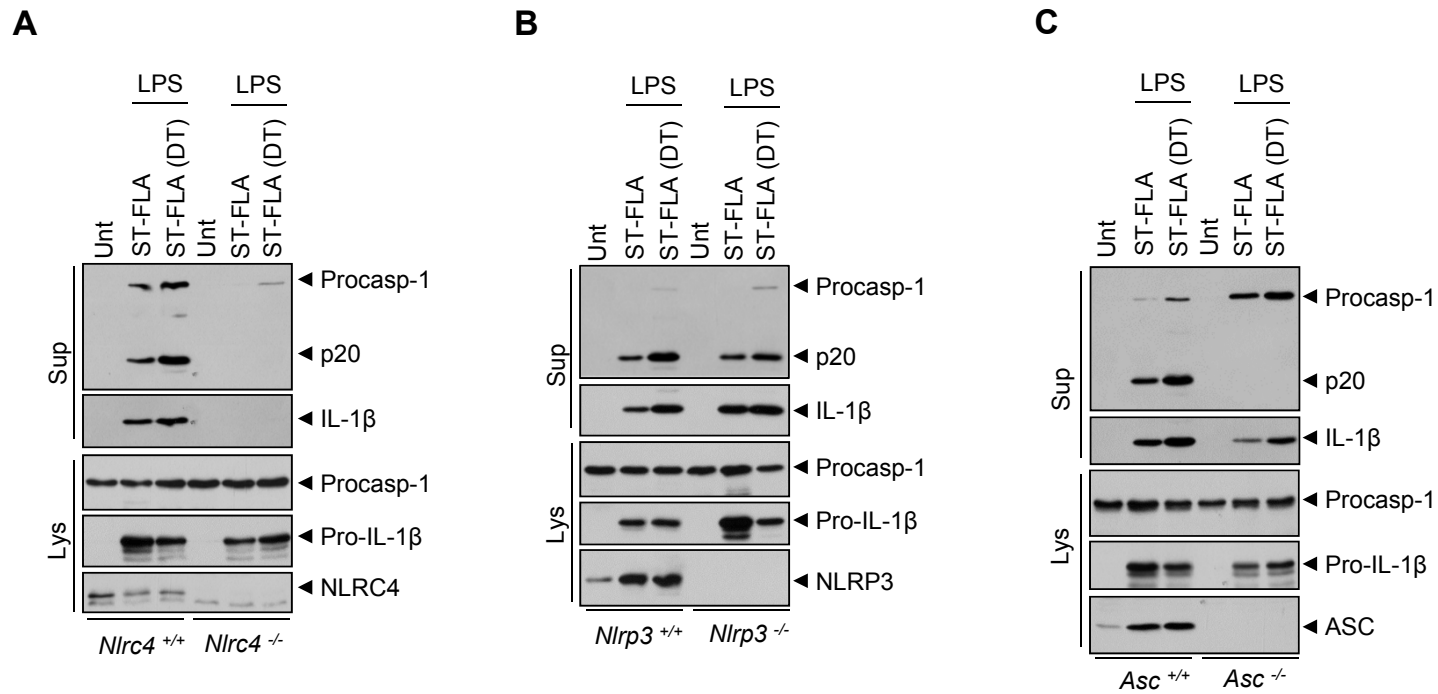

**Supplementary Figure S3. Recombinant flagellin from *S. typhimurium* induces NLRC4 inflammasome activation.** (A, B) Immunoblots from *Nlrc4*<sup>+/+</sup> or *Nlrc4*<sup>-/-</sup> (A) and *Nlrp3*<sup>+/+</sup> or *Nlrp3*<sup>-/-</sup> (B) mice BMDMs treated with LPS (0.25 μg/ml, 3 h), followed by the treatment with *S. typhimurium* flagellin (250 ng/ml, 6 h) with or without DOTAP (DT) pre-mixing. (C) Immunoblots from *Asc*<sup>+/+</sup> or *Asc*<sup>-/-</sup> immortalized BMDMs treated with LPS (0.25 μg/ml, 3 h), followed by the treatment with *S. typhimurium* flagellin (250 ng/ml, 6 h) with or without DT pre-mixing. Culture supernatants (Sup) or cellular lysates (Lys) were immunoblotted with the indicated antibodies. Unt, untreated.

**A**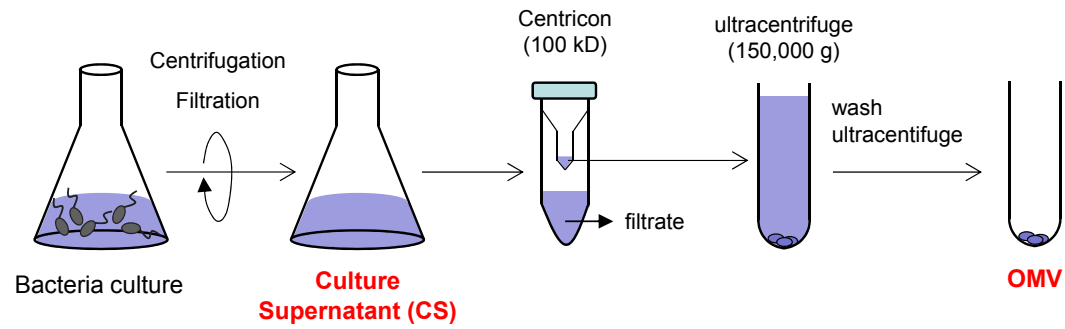**B**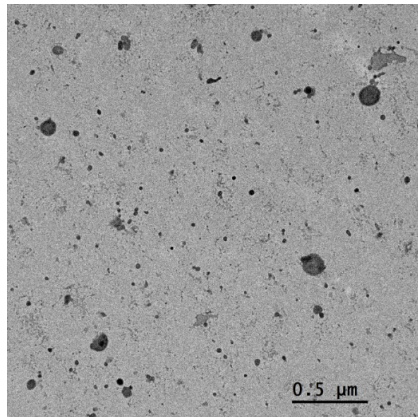**C**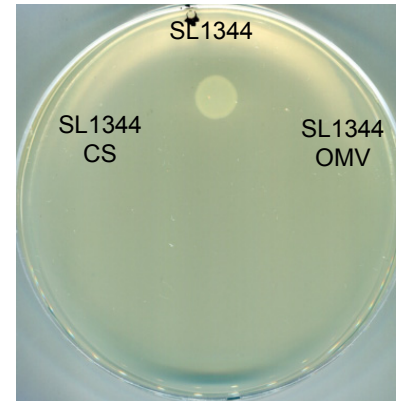

**Supplementary Figure S4. Isolation of *S. typhimurium*-released OMVs.** (A) Illustration of experimental scheme to isolate bacterial outer membrane vesicles (OMVs). (B) Transmission electron microscopy of OMVs isolated from wild-type *S. typhimurium*. Scale bar,  $0.5 \mu\text{m}$ . (C) LB agar plate inoculated with *S. typhimurium* SL1344, SL1344 CS and SL1344 OMV.

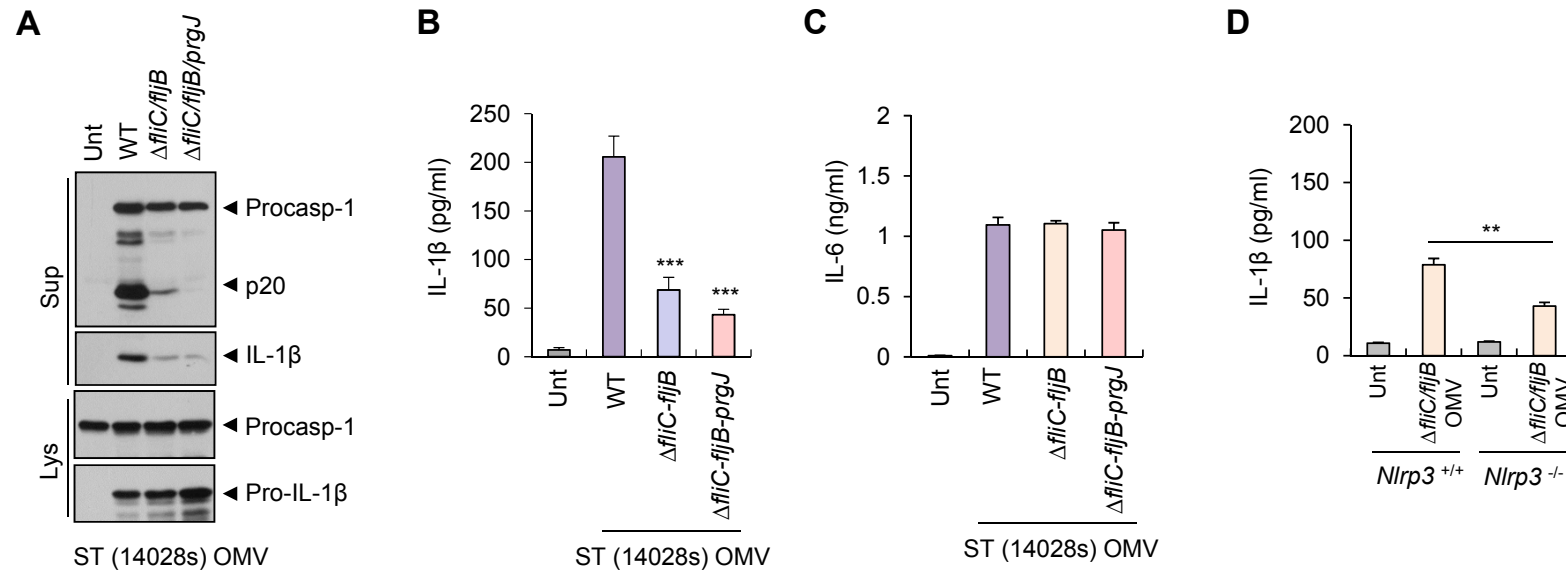

**Supplementary Figure S5. OMV-associated flagellin is critical for the inflammasome activation by *S. typhimurium*-released OMVs.** (A) Immunoblots from mouse BMDMs treated with WT,  $\Delta flic-fljB$ , or  $\Delta flic-fljB-prgJ$  *S. typhimurium* (14028s) OMVs (5  $\mu$ g/ml, 8 h). Culture supernatants (Sup) or cellular lysates (Lys) were immunoblotted with the indicated antibodies. (B) Quantification of IL-1 $\beta$  in the culture supernatants of mouse BMDMs treated with WT,  $\Delta flic-fljB$ , or  $\Delta flic-fljB-prgJ$  *S. typhimurium* (14028s) OMVs (5  $\mu$ g/ml, 8 h). (C) Quantification of IL-6 in the culture supernatants of mouse BMDMs treated with WT,  $\Delta flic-fljB$ , or  $\Delta flic-fljB-prgJ$  *S. typhimurium* (14028s) OMVs (5  $\mu$ g/ml, 8 h). (D) Quantification of IL-1 $\beta$  in the culture supernatants of *Nlrp3*<sup>+/+</sup> or *Nlrp3*<sup>-/-</sup> mice BMDMs treated with  $\Delta flic-fljB$  *S. typhimurium* (SL1344) OMV (5  $\mu$ g/ml, 8 h) ( $n = 5$ ). Asterisks indicate significant difference. (\*\* $P < 0.005$ , \*\*\* $P < 0.001$ )

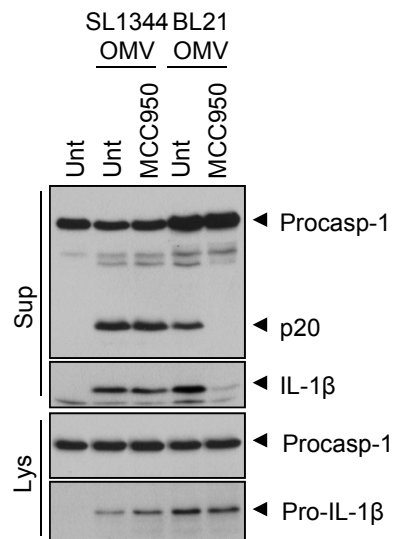

**Supplementary Figure S6. *E. coli*-derived OMVs caused a NLRP3-dependent caspase-1 processing.** Immunoblots from mouse BMDMs treated with *S. typhimurium* (SL1344) OMVs (5  $\mu$ g/ml, 8 h) or *E. coli* (BL21) OMVs (5  $\mu$ g/ml, 8 h) in the presence of MCC950 (100 nM). Culture supernatants (Sup) or cellular lysates (Lys) were immunoblotted with the indicated antibodies.

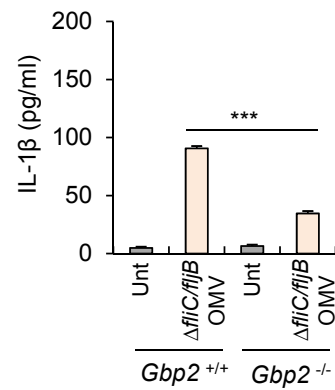

**Supplementary Figure S7. Flagellin-deficient *S. typhimurium*-derived OMVs caused NLRP3-dependent IL-1 $\beta$  production.** Quantification of IL-1 $\beta$  in the culture supernatants of *Gbp2*<sup>+/+</sup> or *Gbp2*<sup>-/-</sup> mice BMDMs treated with  $\Delta flc-fljB$  *S. typhimurium* (SL1344) OMV (5  $\mu$ g/ml, 8 h). ( $n = 5$ ). Asterisk indicates significant difference. (\*\*\*) $P < 0.001$ )
